# Supplementary material for: A fluorescence-positioned hybridization chain reaction system for sensitive detection of Salmonella in milk
Source: Royal Society of Chemistry journal article supplement (doi:10.1039/d0ay00184h), 2020-01-01
Supplement: d0ay00184h1.pdf [file d0ay00184h1.pdf]

Supplementary material

**Fluorescence-positioned hybridization chain reaction system for  
sensitive detection of *Salmonella* in milk**

Guotai Yang<sup>1,#</sup>, Shuang Yu<sup>1,#</sup>, Yang Liu<sup>2,#</sup>, Jin Huang<sup>1</sup>, Qianying Li<sup>1</sup>, Zoraida P.

Aguilar<sup>3</sup>, Hengyi Xu<sup>1,\*</sup>

<sup>1</sup>State Key Laboratory of Food Science and Technology, Nanchang University,  
Nanchang, 330047, PR China.

<sup>2</sup>The First Affiliated Hospital of Nanchang University, Nanchang 330000, China.

<sup>3</sup>Zystein, LLC., Fayetteville, AR 72704, USA

#Co-first authors

\*Correspondence to:

Dr. Hengyi Xu

State Key Laboratory of Food Science and Technology, Nanchang University.

Address: 235 Nanjing East Road, Nanchang 330047, P.R. China.

Phone: +0086-791-8830-4447-ext-9520.

Fax: +0086-791-8830-4400.

E-mail: kidyxu@163.com, HengyiXu@ncu.edu.cn.

The codes used to calculate the RGB values of the fluorescence image was shown as follows:

```
im = Image.open(filepath)

pix = im.load()

width = im.size[0]

height = im.size[1]

im1 = im.convert("YCbCr")

gd_excel.setExcelName(wordFile)

gd_excel.openExcel()

gd_excel.createTitle()

datacount = []

indexX = 1

indexY = 1

for i in range(255):

    datacount.append(0)

for x in range(width):

    for y in range(height):

        y,cb,cr = im1.getpixel((x,y))

        print y

        if y != 255:

            datacount[y] +=1
```

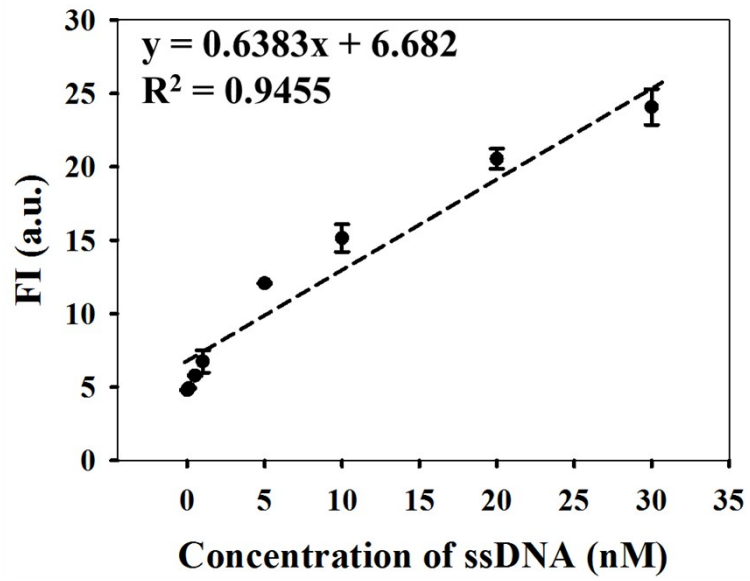

**Figure S 1.** Sensitivity of the proposed fluorescence-positioned HCR system for DNA detection. Error bars represent the SD of 3 replicates.
